# Supplementary material
Source: Springer Nature journal article supplement (https://www.springermedizin.de/resource/supplementary/12891_2011_1571_MOESM3_ESM.pdf/9508122)

### (a) Cytokine IL-17 in PBMC (pg/mL).

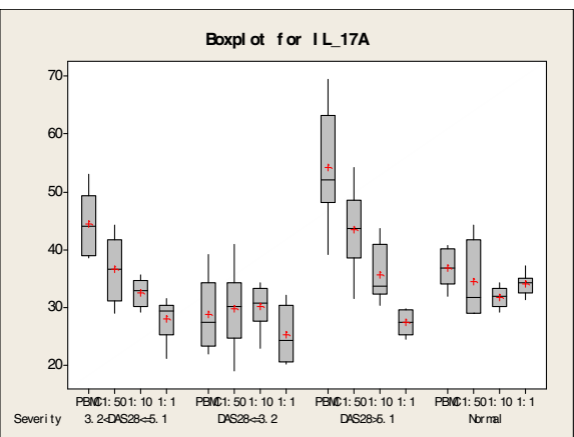

### (b) Cytokine TNF- $\alpha$ (pg/mL)

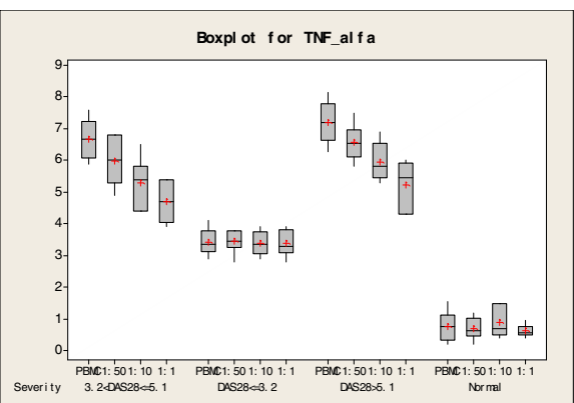

### (c) Cytokine IL-6 (pg/mL)

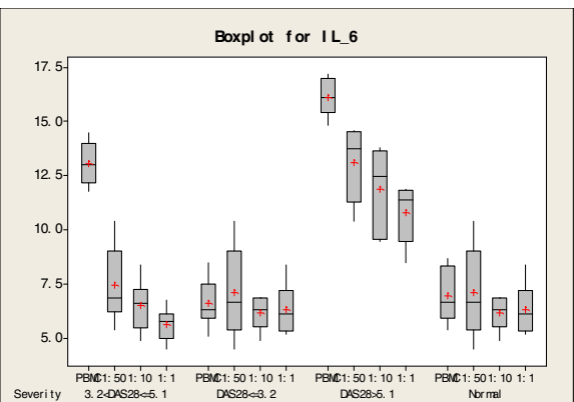

Supplement: MOESM3 [file 9508122]
